# Supplementary material
Source: PubMed Central journal article supplement (PMC2762007)
Supplement: NIHMS140736-supplement-01.pdf [file NIHMS140736-supplement-01.pdf]

## Supplemental Material for

### “Heme Reversibly Damps PERIOD2 Rhythms in Mouse Suprachiasmatic Nucleus Explants” Casey J. Guenthner, David Bickar, and Mary E. Harrington

**Supplemental Table**

| Treatment                                                                 | n  | Damping       | Period (h)     |              | Washout RI    | Arrhythmic |      |
|---------------------------------------------------------------------------|----|---------------|----------------|--------------|---------------|------------|------|
|                                                                           |    |               | Pre            | Post         |               | Pre        | Post |
| SCN                                                                       |    |               |                |              |               |            |      |
| Controls                                                                  | 24 | 0.262 ± 0.026 | 24.54 ± 0.09   | 23.72 ± 0.17 | 0.572 ± 0.025 | 1          | 0    |
| 170 μM Na <sub>3</sub> PO <sub>4</sub>                                    | 18 | 0.266 ± 0.032 | 24.58 ± 0.10   | 24.02 ± 0.11 | 0.585 ± 0.030 | 1          | 0    |
| .2 % DMSO + 170 μM Na <sub>3</sub> PO <sub>4</sub>                        | 6  | 0.253 ± 0.048 | 24.46 ± 0.20   | 22.85 ± 0.48 | 0.530 ± 0.042 | 0          | 0    |
| Heme, 3 μM                                                                | 15 | 0.382 ± 0.023 | 24.27 ± 0.18   | 23.81 ± 0.23 | 0.533 ± 0.036 | 0          | 0    |
| Heme, 30 μM                                                               | 12 | 0.557 ± 0.052 | 25.04 ± 0.14   | 24.14 ± 0.20 | 0.576 ± 0.035 | 0          | 1    |
| Heme, 100 μM                                                              | 4  | 0.676 ± 0.077 | 24.95 ± 0.48   | 23.52 ± 0.65 | 0.630 ± 0.021 | 1          | 1    |
| Protoporphyrin IX, 30 μM                                                  | 5  | 0.247 ± 0.039 | 24.81 ± 0.08   | 23.80 ± 0.64 | 0.504 ± 0.052 | 1          | 0    |
| SnPP, 30 μM                                                               | 7  | 0.582 ± 0.056 | 24.61 ± 0.13   | 23.84 ± 0.26 | 0.572 ± 0.033 | 1          | 2    |
| Keto, 10 μM                                                               | 6  | 0.610 ± 0.102 | 23.59 ± 0.19 * | 24.52 ± 0.35 | 0.565 ± 0.024 | 0          | 0    |
| SnPP, 30 μM + Heme, 30 μM                                                 | 9  | 0.878 ± 0.076 | 25.16 ± 0.32   | 23.19 ± 0.44 | 0.574 ± 0.030 | 1          | 0    |
| Keto, 10 μM + Heme, 30 μM                                                 | 5  | 0.518 ± 0.042 | 25.38 ± 0.21   | 23.87 ± 0.34 | 0.610 ± 0.019 | 1          | 0    |
| Fe(NH <sub>4</sub> ) <sub>2</sub> (SO <sub>4</sub> ) <sub>2</sub> , 30 μM | 5  | 0.325 ± 0.063 | 24.72 ± 0.23   | 24.03 ± 0.50 | 0.598 ± 0.024 | 0          | 1    |
| Biliverdin, 3 μM                                                          | 7  | 0.344 ± 0.035 | 24.66 ± 0.08   | 24.22 ± 0.17 | 0.579 ± 0.040 | 0          | 0    |
| Biliverdin, 30 μM                                                         | 9  | 0.503 ± 0.061 | 24.57 ± 0.19   | 23.23 ± 0.38 | 0.550 ± 0.032 | 1          | 0    |
| CO, 30 μM                                                                 | 5  | 0.448 ± 0.068 | 24.13 ± 0.35   | 24.80 ± 0.81 | 0.387 ± 0.068 | 0          | 1    |
| CO, 100 μM                                                                | 7  | 0.390 ± 0.060 | 24.55 ± 0.28   | 25.12 ± 0.85 | 0.419 ± 0.053 | 0          | 0    |
| Air                                                                       | 9  | 0.439 ± 0.079 | 24.35 ± 0.18   | 24.91 ± 0.68 | 0.421 ± 0.061 | 0          | 0    |
| N-methylprotoporphyrin IX, 10 μM                                          | 5  | 0.298 ± 0.043 | 24.68 ± 0.10   | 23.73 ± 0.47 | 0.513 ± 0.039 | 1          | 0    |
| N-methylprotoporphyrin IX, 50 μM                                          | 6  | 0.379 ± 0.030 | 25.57 ± 0.10 * | 23.00 ± 0.26 | 0.560 ± 0.042 | 1          | 1    |
| Esophagus                                                                 |    |               |                |              |               |            |      |
| Control (170 μM Na <sub>3</sub> PO <sub>4</sub> )                         | 7  | 0.605 ± 0.097 | 22.89 ± 0.24   | 23.34 ± 0.20 | 0.600 ± 0.011 | 0          | 0    |
| Heme, 30 μM                                                               | 8  | 0.544 ± 0.051 | 23.16 ± 0.28   | 23.62 ± 0.13 | 0.596 ± 0.020 | 0          | 0    |
| Heme, 100 μM                                                              | 7  | 0.702 ± 0.094 | 23.60 ± 0.43   | 23.79 ± 0.35 | 0.549 ± 0.037 | 0          | 0    |
| SnPP, 30 μM                                                               | 6  | 0.560 ± 0.045 | 23.61 ± 0.23   | 23.20 ± 0.10 | 0.618 ± 0.016 | 0          | 0    |
| Heme, 30 μM + SnPP, 30 μM                                                 | 5  | 0.608 ± 0.025 | 24.07 ± 0.13   | 23.87 ± 0.37 | 0.558 ± 0.022 | 1          | 0    |
| Thymus                                                                    |    |               |                |              |               |            |      |
| Control (170 μM Na <sub>3</sub> PO <sub>4</sub> )                         | 6  | 0.786 ± 0.126 | 24.56 ± 0.30   | 23.49 ± 0.14 | 0.471 ± 0.035 | 0          | 0    |
| Heme, 30 μM                                                               | 6  | 0.762 ± 0.074 | 25.06 ± 0.26   | 23.77 ± 0.11 | 0.502 ± 0.014 | 0          | 0    |
| SnPP, 30 μM                                                               | 6  | 0.934 ± 0.079 | 23.71 ± 0.15   | 23.56 ± 0.19 | 0.494 ± 0.035 | 0          | 0    |
| Heme, 30 μM + SnPP, 30 μM                                                 | 6  | 0.858 ± 0.060 | 24.84 ± 0.33   | 23.82 ± 0.18 | 0.514 ± 0.019 | 0          | 0    |
| Spleen                                                                    |    |               |                |              |               |            |      |
| Control (170 μM Na <sub>3</sub> PO <sub>4</sub> )                         | 6  | 0.539 ± 0.052 | 23.10 ± 0.20   | 24.48 ± 0.38 | 0.598 ± 0.009 | 0          | 0    |
| Heme, 30 μM                                                               | 6  | 0.664 ± 0.079 | 23.54 ± 0.26   | 24.20 ± 0.40 | 0.574 ± 0.028 | 0          | 0    |
| SnPP, 30 μM                                                               | 6  | 0.722 ± 0.063 | 23.37 ± 0.17   | 23.68 ± 0.12 | 0.597 ± 0.032 | 0          | 0    |
| Heme, 30 μM + SnPP, 30 μM                                                 | 6  | 0.942 ± 0.106 | 23.70 ± 0.16   | 23.57 ± 0.13 | 0.624 ± 0.027 | 0          | 0    |

Summary of the number of samples excluded from each group due to arrhythmia (rightmost column) either before (“Pre”) or after (“Post”) the media change, the numbers of samples included in the final analysis (n; those tissues excluded due to arrhythmia are not counted), and the mean (± SEM) damping constant, pre-media change periods, post-media change periods, and rhythmicity indices (RI) following the media change for each group. (\*, for period, significantly different from control of the same tissue, Tukey’s HSD,  $p < .05$ ; significant differences for damping and RI are discussed in the Results in the main text); Keto, ketoconazole; SnPP, tin-protoporphyrin IX; CO, carbon monoxide; DMSO, dimethylsulfoxide

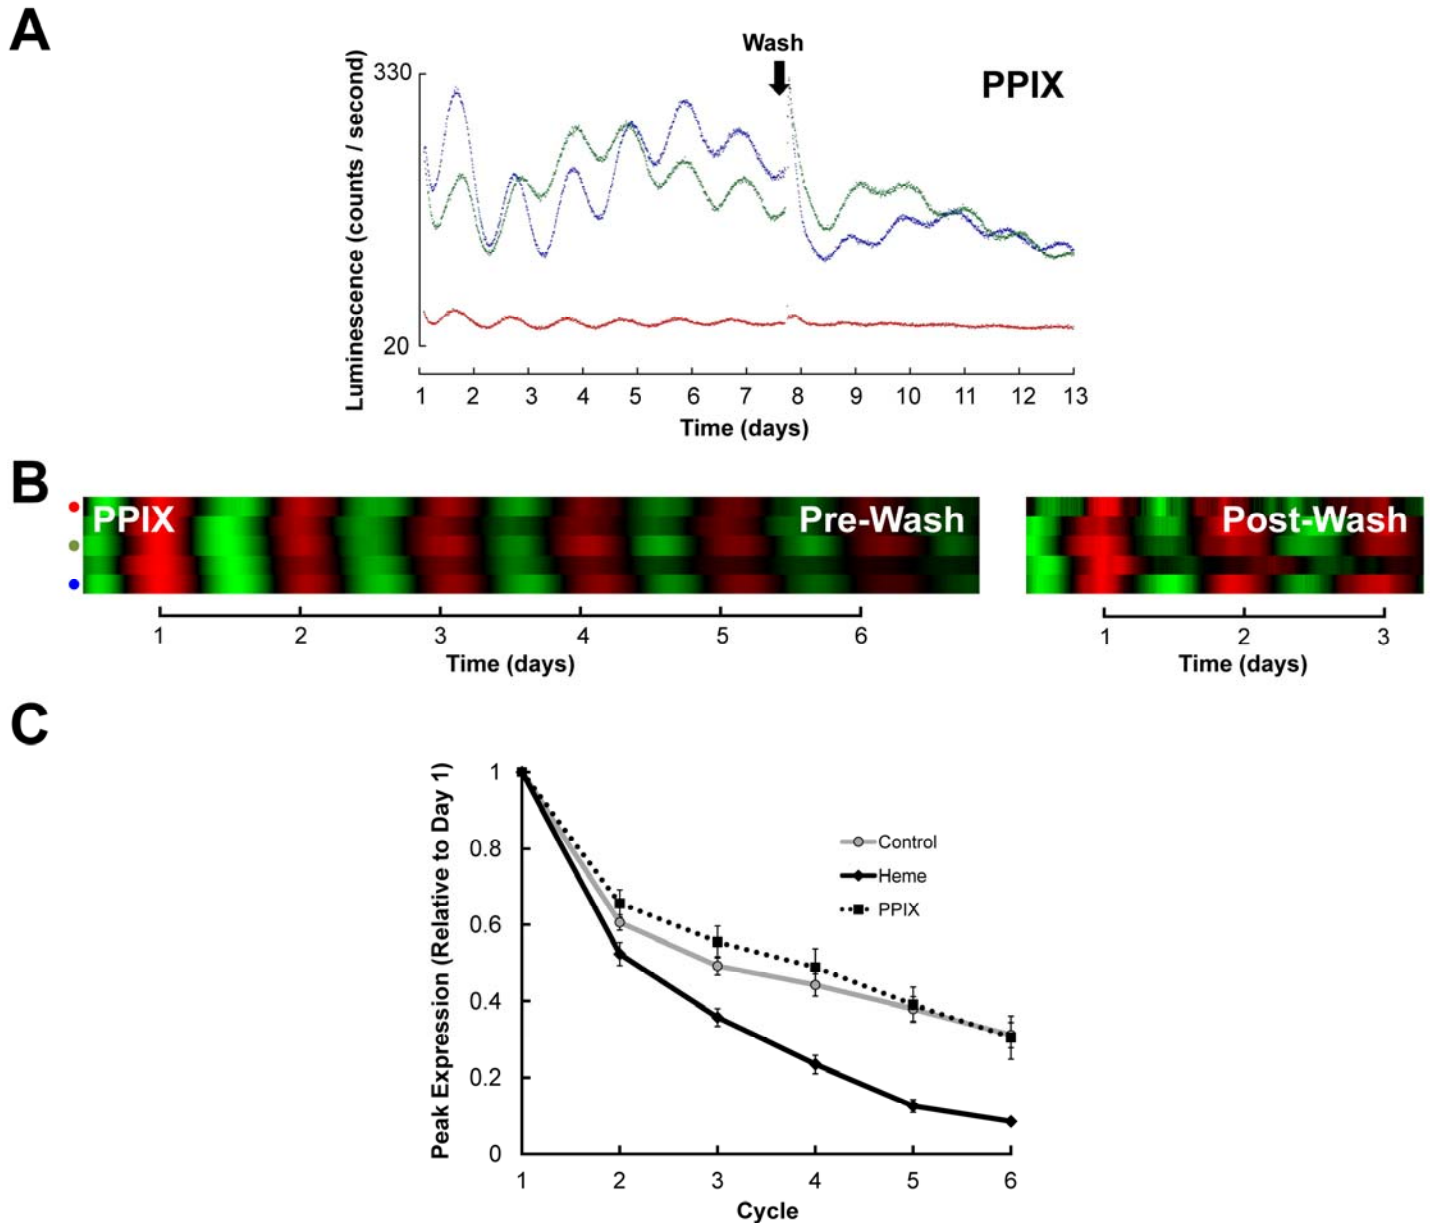

**Figure S1.** Effects of 30  $\mu$ M protoporphyrin IX (PPIX) on mouse SCN PER2::LUCIFERASE rhythms. **A**, Three representative luminescence traces from SCN slices treated with PPIX from dissection time (Day 0); downward arrow indicates time of media change. **B**, Heatmap representing baseline-subtracted and smoothed traces from all PPIX-treated SCN explants. Each heatmap row represents a separate sample, the x-axis represents time, and color represent normalized luminescence (green indicates low luminescence levels, red indicates high luminescence levels, black indicates near-baseline luminescence; see key to Figure 1 in the main text). Traces before the media change (left panel) were normalized independently of traces after the media change (right panel). Red, blue, and green dots to the left of the heatmap identify heatmap rows corresponding to the red, blue, and green row traces in part A. **C**, Mean peak expression of each circadian cycle, normalized to the peak expression of the cycle on the day after dissection (Cycle 1), for control SCN explants (gray, solid line) and for explants treated with 30  $\mu$ M heme (black, solid line) or with 30  $\mu$ M PPIX (black, dotted line). A two-way repeated measures ANOVA indicated significant effects of treatment ( $F_{(2,38)} = 12.933$ ,  $p < .001$ ) and of day ( $F_{(4,152)} = 415.313$ ,  $p < .001$ ) and a significant treatment X day interaction ( $F_{(8,152)} = 9.062$ ,  $p < .001$ ) with Tukey's HSD's revealing that PPIX did not differ from the control group ( $p = .679$ ) but did differ from the heme group ( $p = .001$ ). In this and subsequent figures, error bars indicate  $\pm$  SEM.

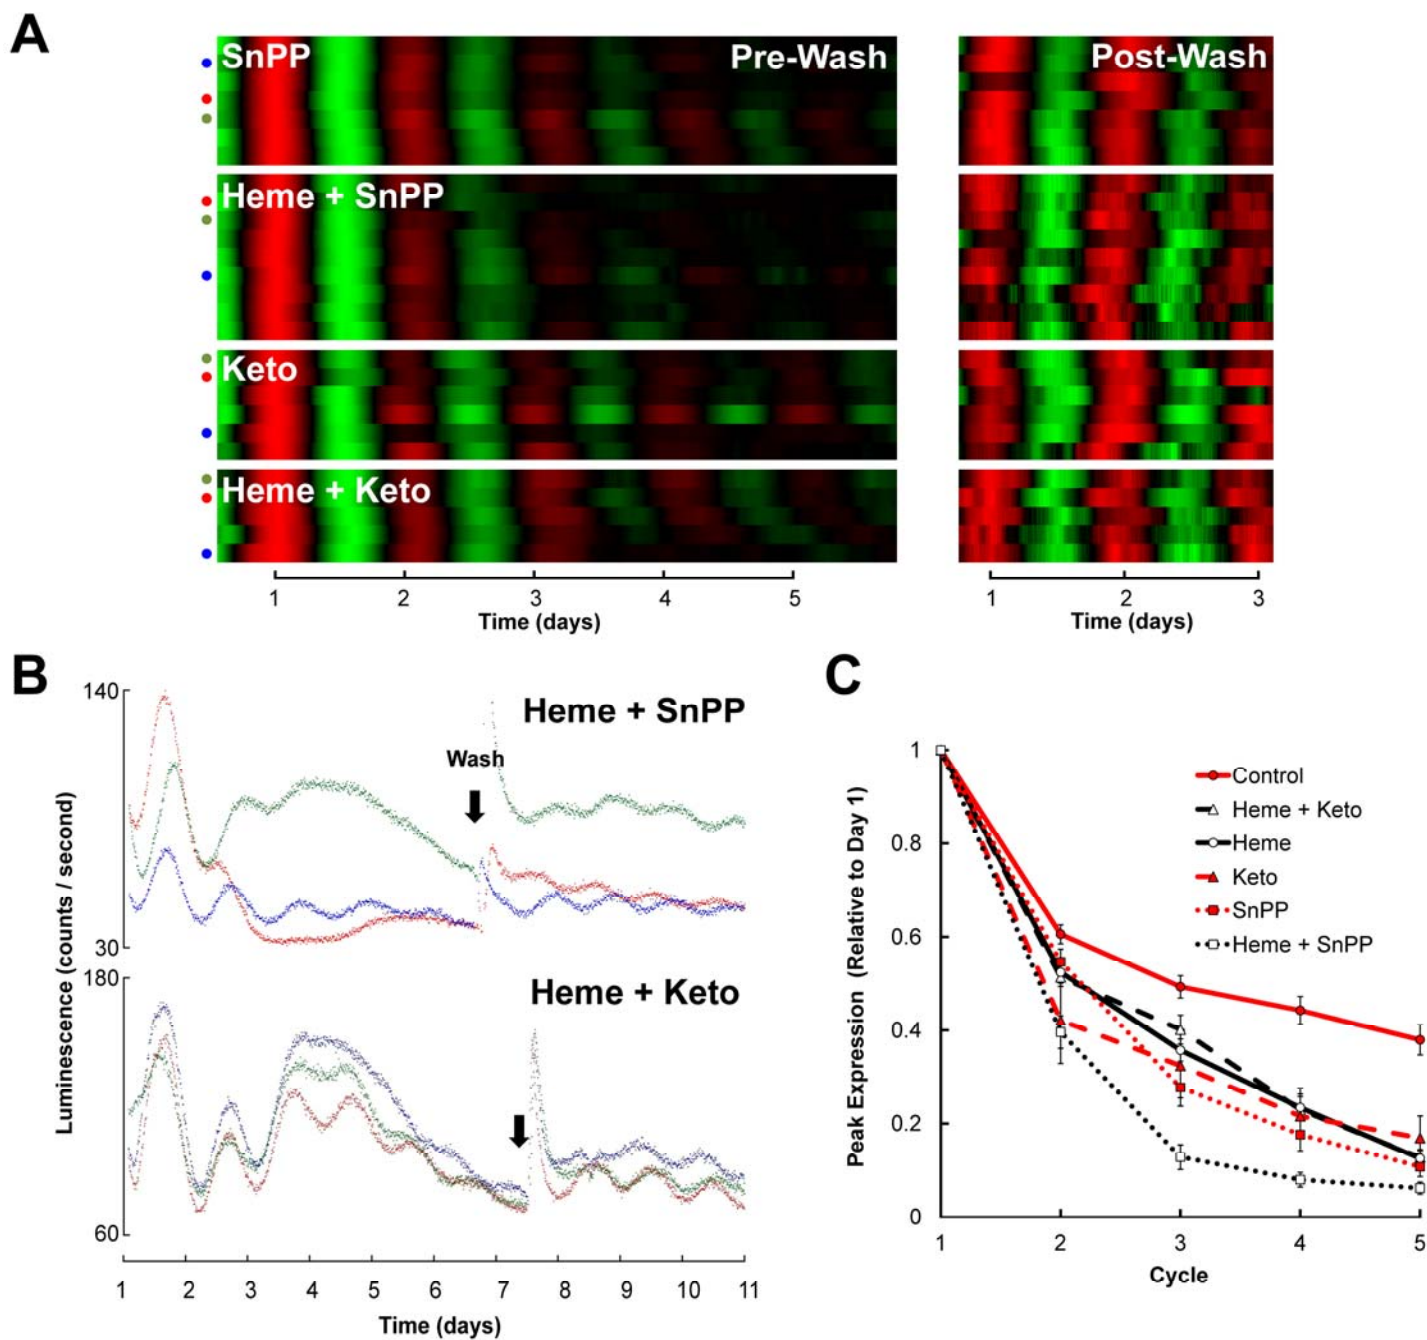

**Figure S2.** Representative raw traces (**B**) and all baseline-subtracted, smoothed, and normalized traces (**A**) for SCNs treated with 30  $\mu$ M tin-protoporphyrin IX (SnPP; top) or 10  $\mu$ M ketoconazole (Keto; bottom) in the presence or absence of 30  $\mu$ M heme (see Fig. 4 in the main text). **C**, Peak PER2::LUC expression (normalized to peak expression on the first cycle *in vitro*) for SCNs treated as in part A. A three-way (Day X Heme X Inhibitor) repeated-measures ANOVA indicated significant effects of inhibitor ( $F_{(2,57)} = 17.45$ ,  $p < .0001$ ) and of heme ( $F_{(1,57)} = 8.503$ ,  $p = .0051$ ) and a significant inhibitor X heme interaction ( $F_{(2,57)} = 4.550$ ,  $p = .0147$ ); all possible within-subjects effects and interactions were also significant ( $p$ 's  $< .001$ ).

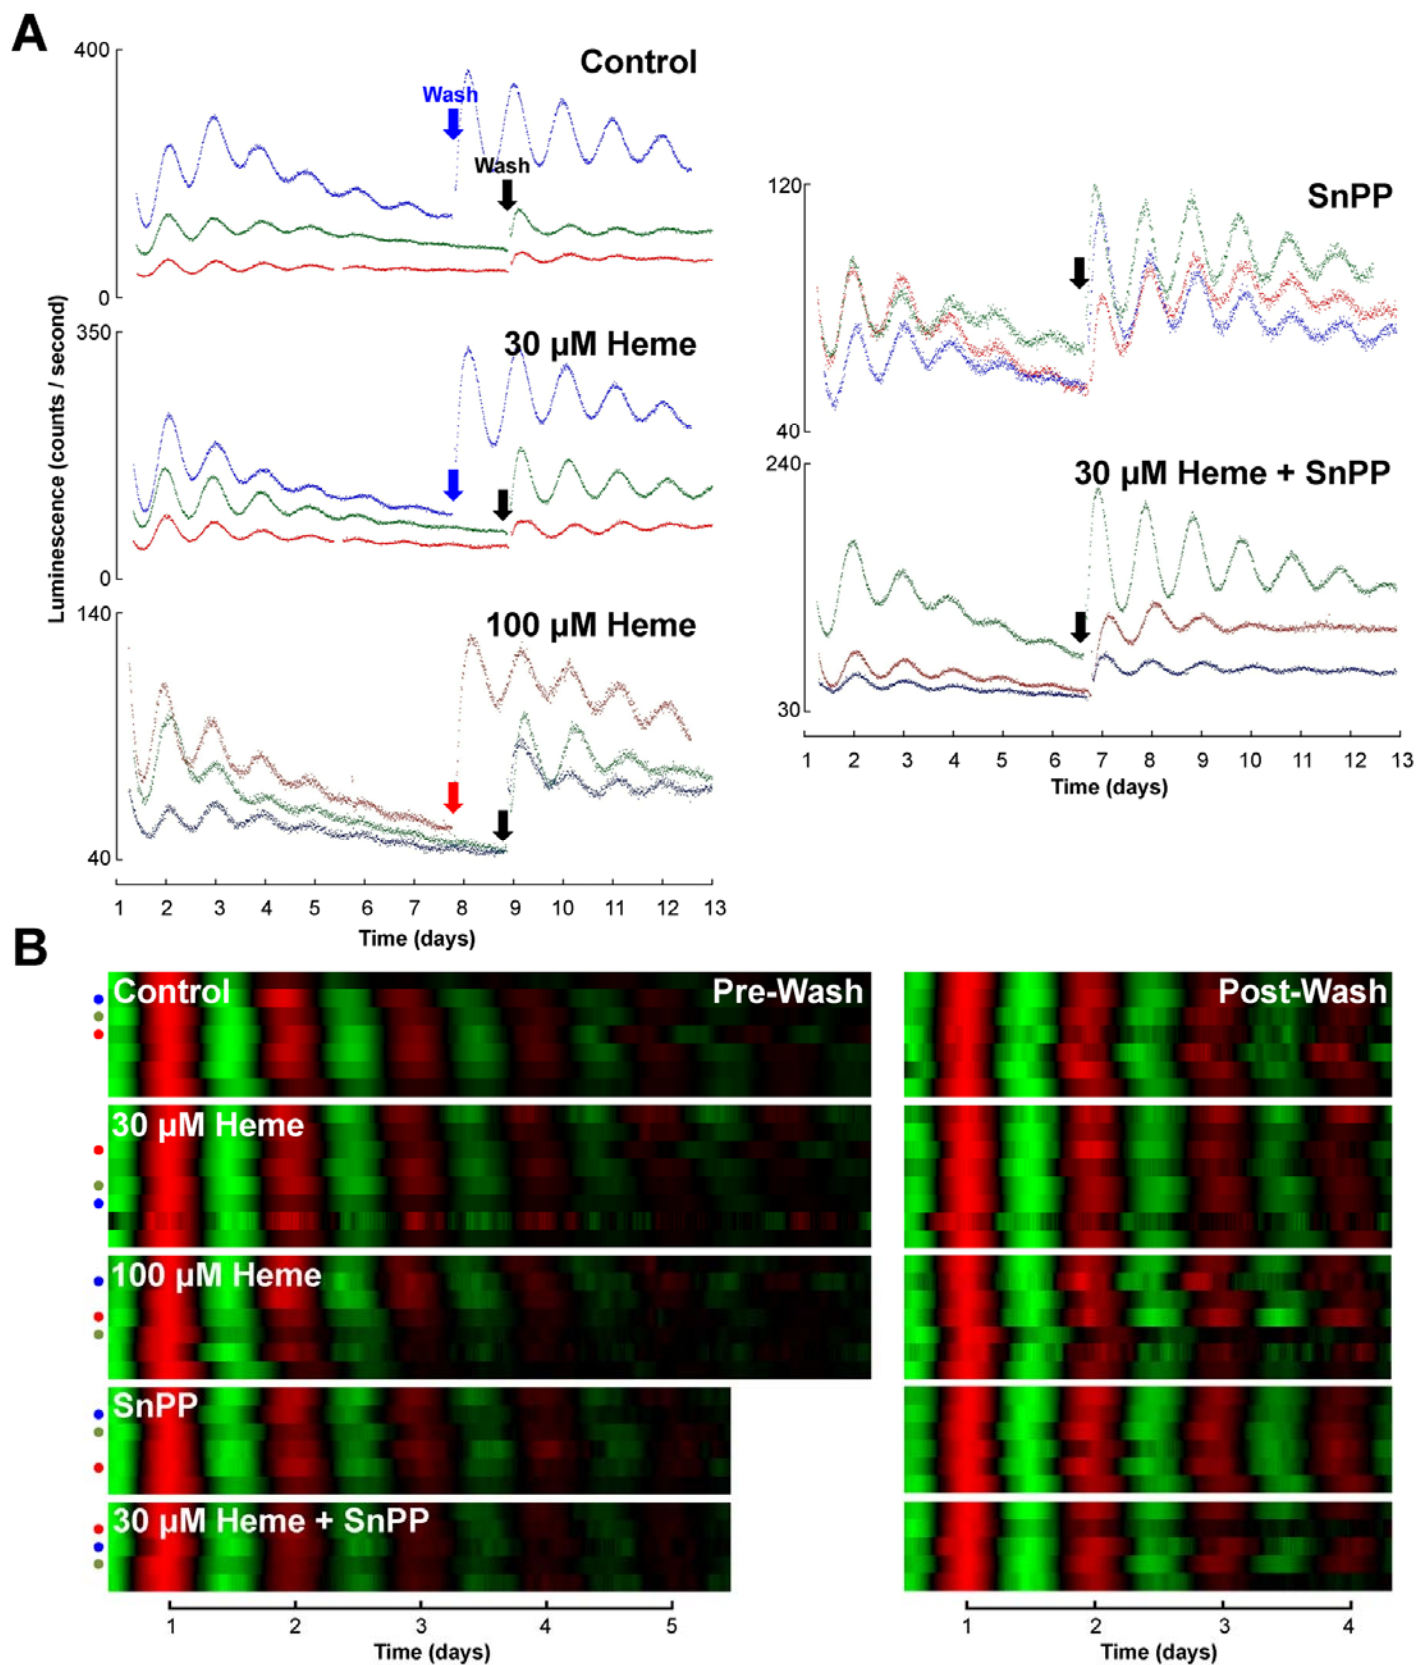

**Figure S3.** Representative raw traces (**A**) and all baseline-subtracted, smoothed, and normalized traces (**B**) for control esophagus explants and for esophagus explants treated with 30  $\mu$ M or 100  $\mu$ M heme or with 30  $\mu$ M tin-protoporphyrin IX (SnPP) in the presence or absence of 30  $\mu$ M heme.

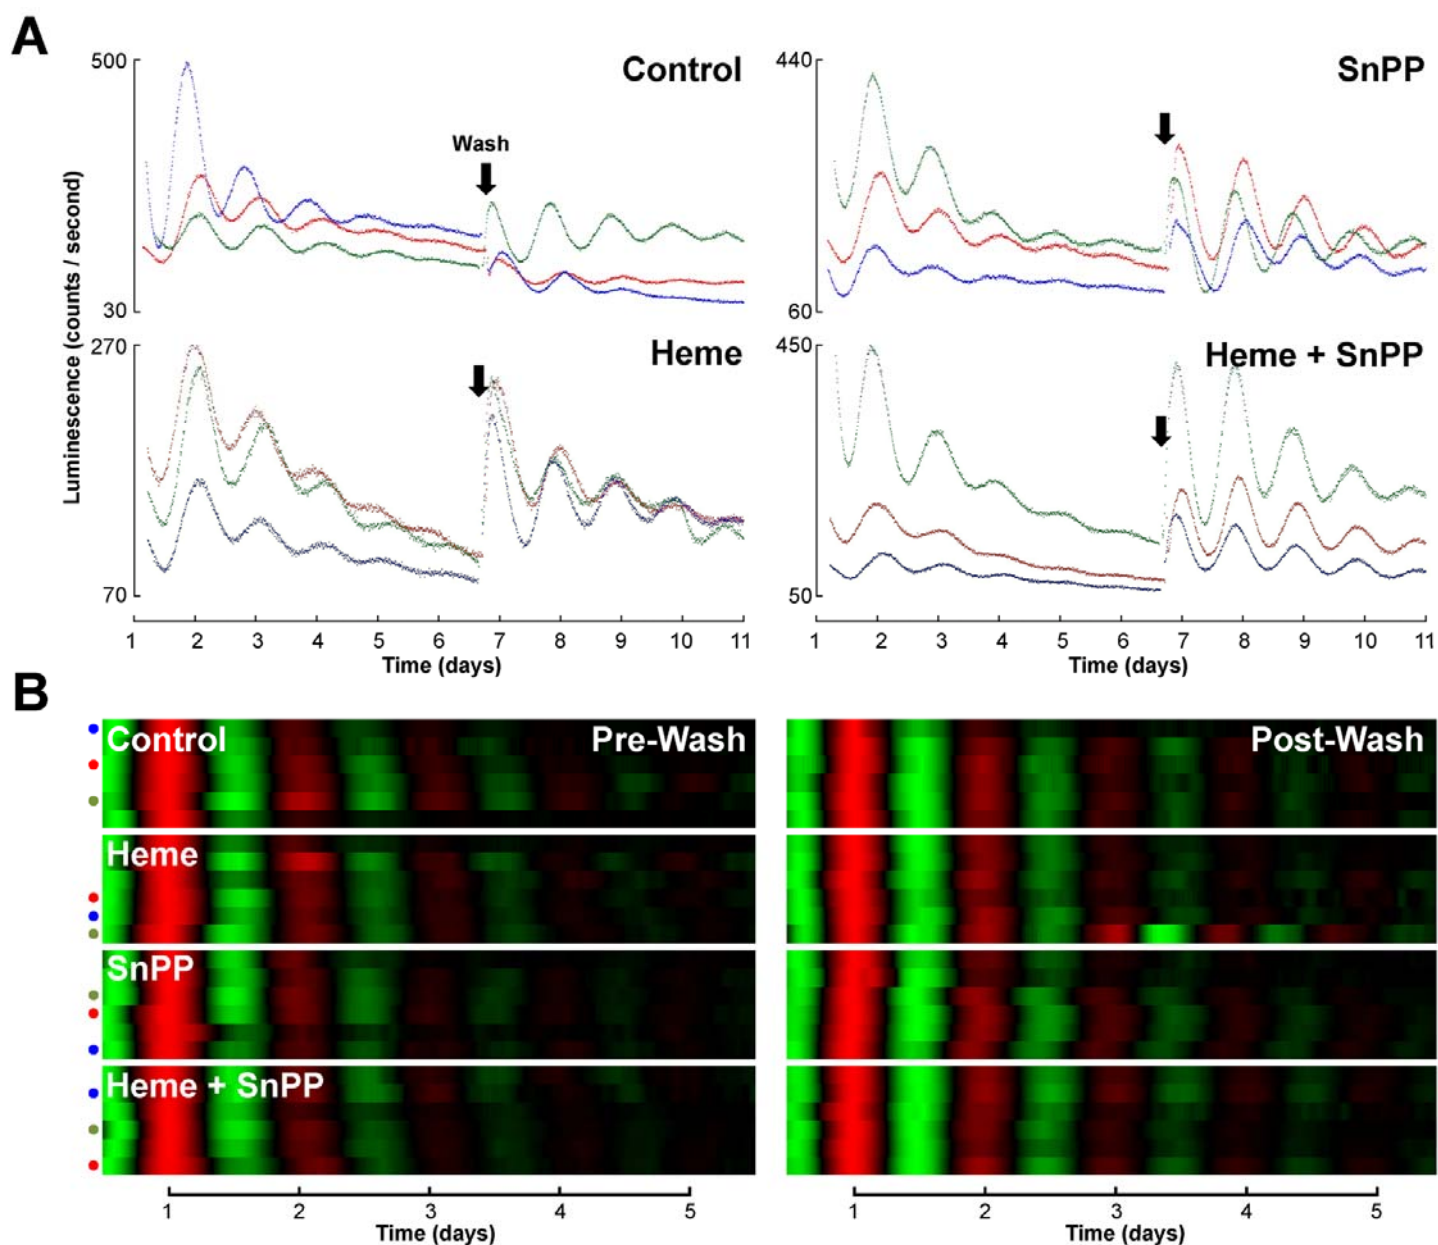

**Figure S4.** Representative raw traces (**A**) and all baseline-subtracted, smoothed, and normalized traces (**B**) for control thymus explants and for thymus explants treated with 30  $\mu$ M tin-protoporphyrin IX (SnPP) or 30  $\mu$ M heme alone or together.

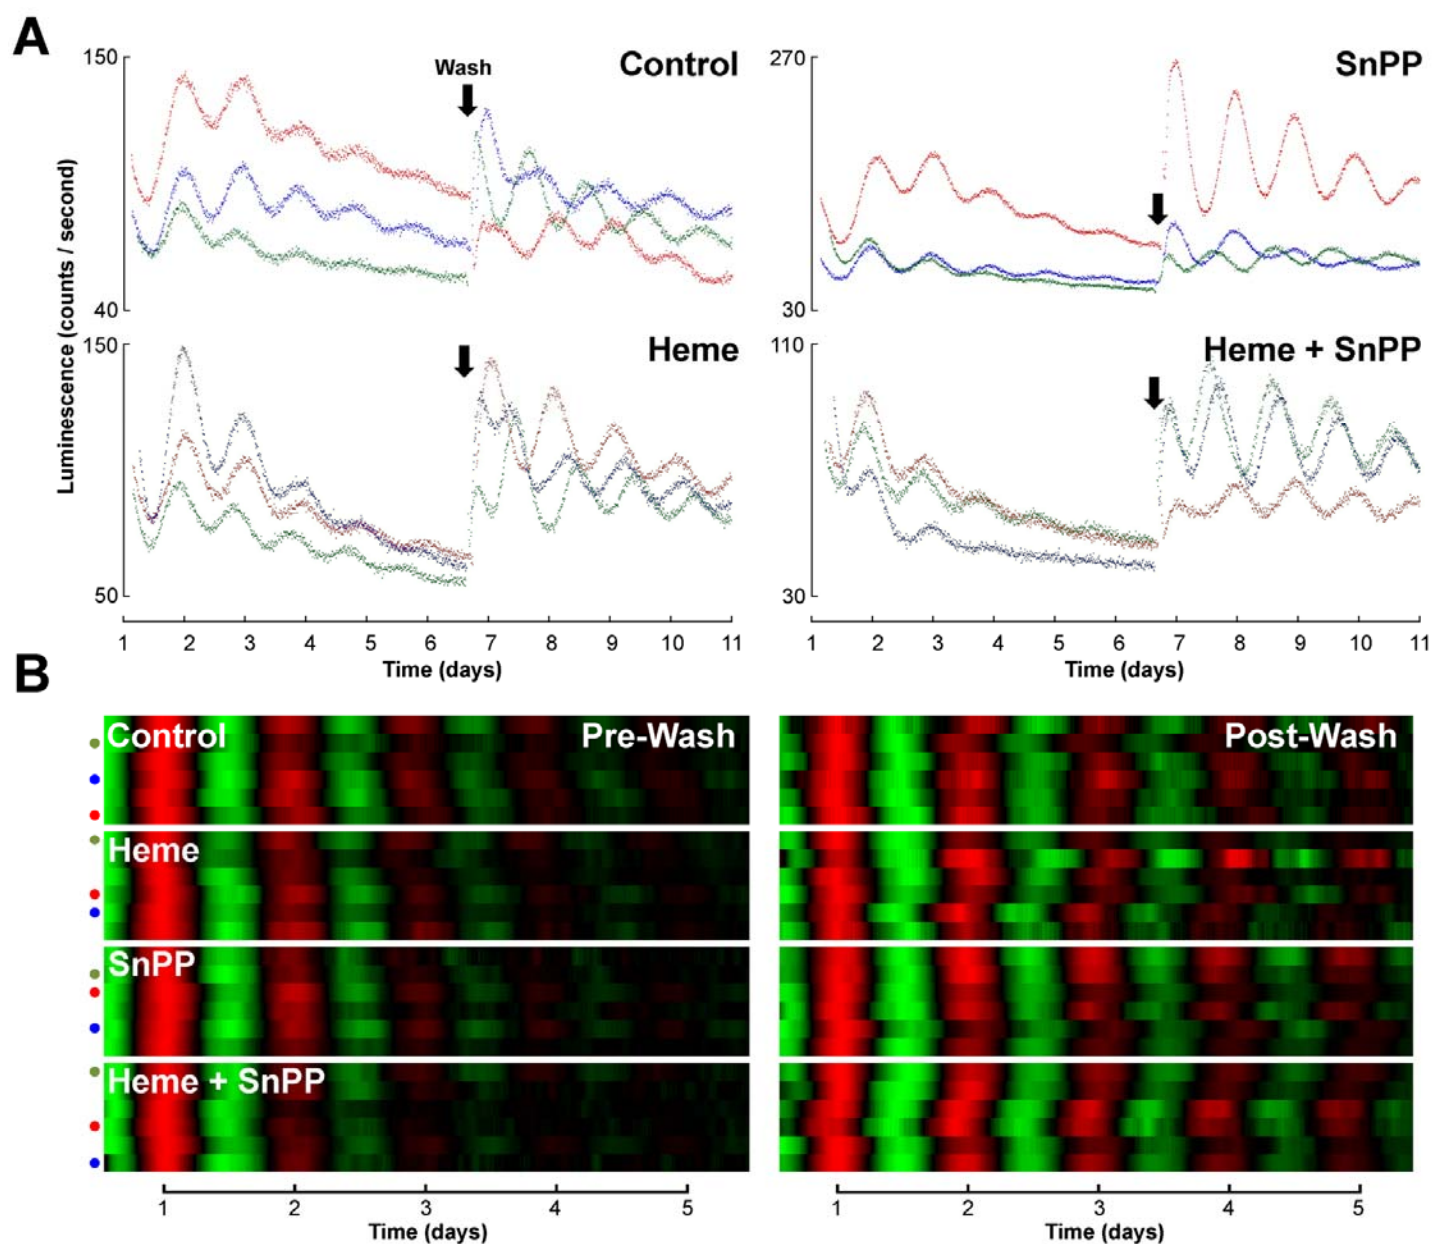

**Figure S5.** Representative raw traces (**A**) and all baseline-subtracted, smoothed, and normalized traces (**B**) for control spleen explants and for spleen explants treated with 30  $\mu$ M tin-protoporphyrin IX (SnPP) and 30  $\mu$ M heme alone or together.

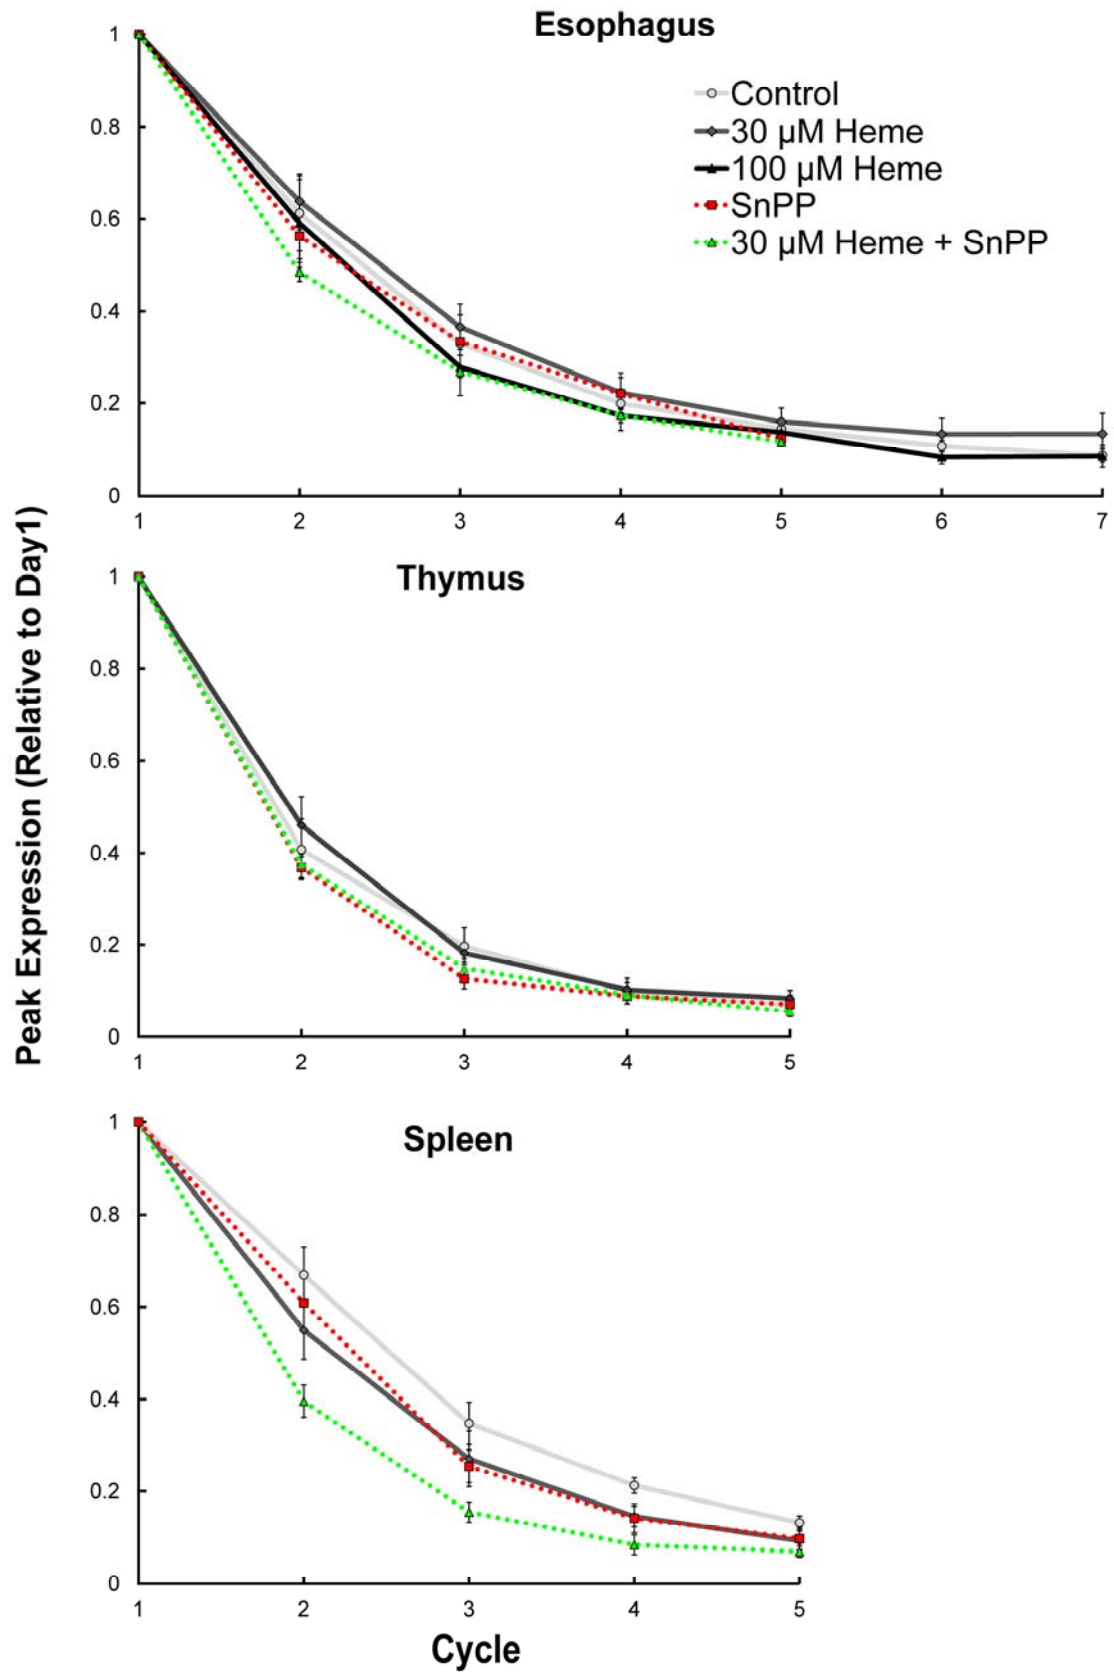

**Figure S6.** Effects of 30  $\mu$ M heme, 30  $\mu$ M SnPP, or both on relative peak PER2::LUC expression in esophagus (top), thymus (middle), and spleen (bottom) explants. A three-way repeated measures ANOVA (Heme X Inhibitor X Cycle) indicated no effect of heme or SnPP in esophagus or thymus explants ( $p$ 's for all between-subjects factors and interactions  $> .165$ ). However, in spleen explants, a similar analysis indicated a significant effect of heme ( $p = .010$ ) and of SnPP ( $p = .007$ ) but no heme X SnPP interaction ( $p = .984$ ).

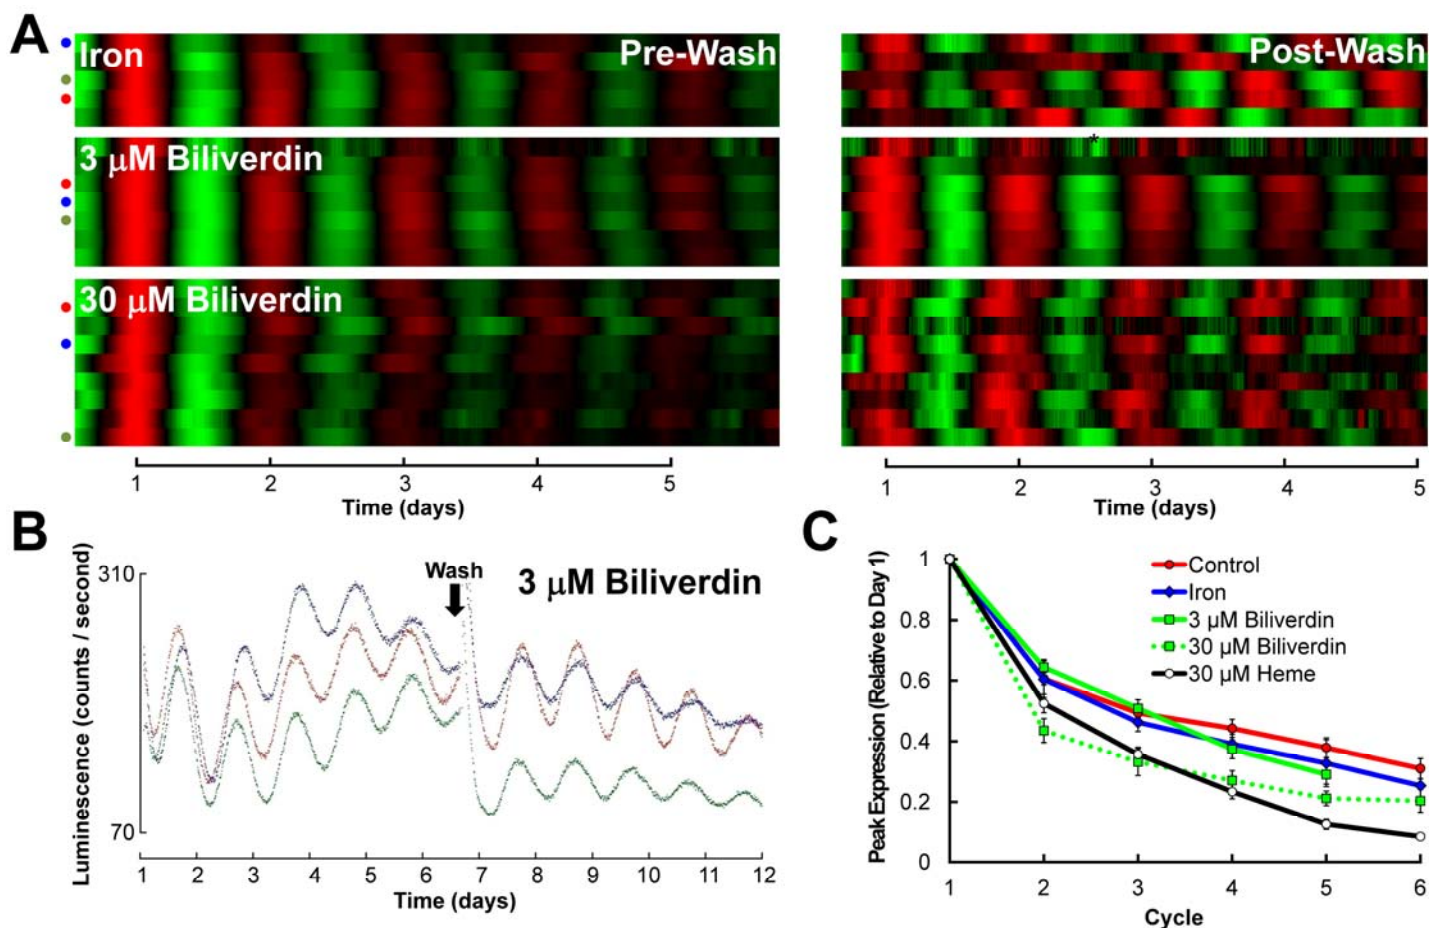

**Figure S7. A**, All baseline-subtracted, smoothed, and normalized data for SCNs treated with iron and biliverdin. Colored dots to the left of the rows indicate which traces are presented in part B and in Fig. 6A. **B**, Three representative raw traces of SCNs treated with 3  $\mu$ M biliverdin. **C**, Mean peak PER2::LUC expression for each cycle (normalized to the first cycle) for control SCNs (red) and for SCNs treated with 30  $\mu$ M iron (blue), 3-30  $\mu$ M biliverdin (green), or 30  $\mu$ M heme (black). We found a significant effect of treatment (two-way repeated measures ANOVA,  $F_{(4,52)} = 8.818$ ,  $p < .0001$ ) and a significant treatment X cycle interaction ( $F_{(16,208)} = 5.838$ ,  $p < .0001$ ); 30  $\mu$ M biliverdin and 30  $\mu$ M hemin groups but not the  $\text{Fe}^{2+}$  or 3  $\mu$ M biliverdin groups differed from the control (Tukey's HSD: control vs. 3  $\mu$ M biliverdin,  $p = .973$ ; control vs.  $\text{Fe}^{2+}$ ,  $p = .956$ ; control vs. 30  $\mu$ M biliverdin,  $p = .0006$ ; control vs. 30  $\mu$ M hemin,  $p = .0001$ ).

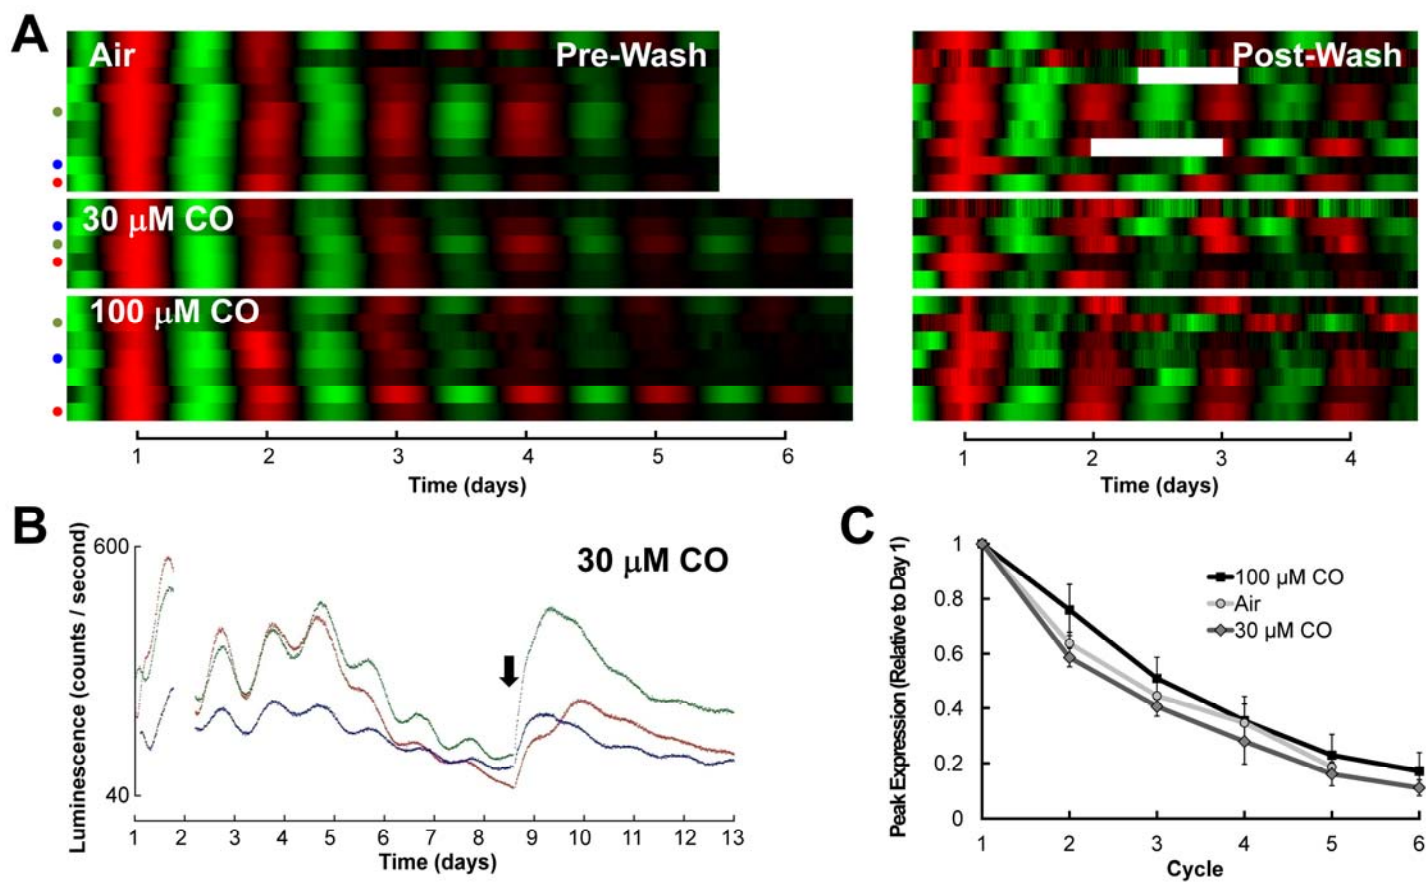

**Figure S8. A**, All baseline-subtracted, smoothed, and normalized data for SCNs sealed with carbon monoxide (CO) or under air. Colored dots to the left of the rows indicate which traces are presented in part B and in Fig. 6C. **B**, Three representative raw traces of SCNs treated with 30  $\mu\text{M}$  CO. **C**, Mean peak PER2::LUC expression for each cycle (normalized to the first cycle) for air- and CO-treated SCNs. We observed no differences between SCN slices sealed under air and those sealed under 30  $\mu\text{M}$  or 100  $\mu\text{M}$  carbon monoxide (two-way repeated measures ANOVA: treatment,  $F_{(2,18)} = .915$ ,  $p = .418$ ; day X treatment,  $F_{(8,72)} = .503$ ,  $p = .850$ ).

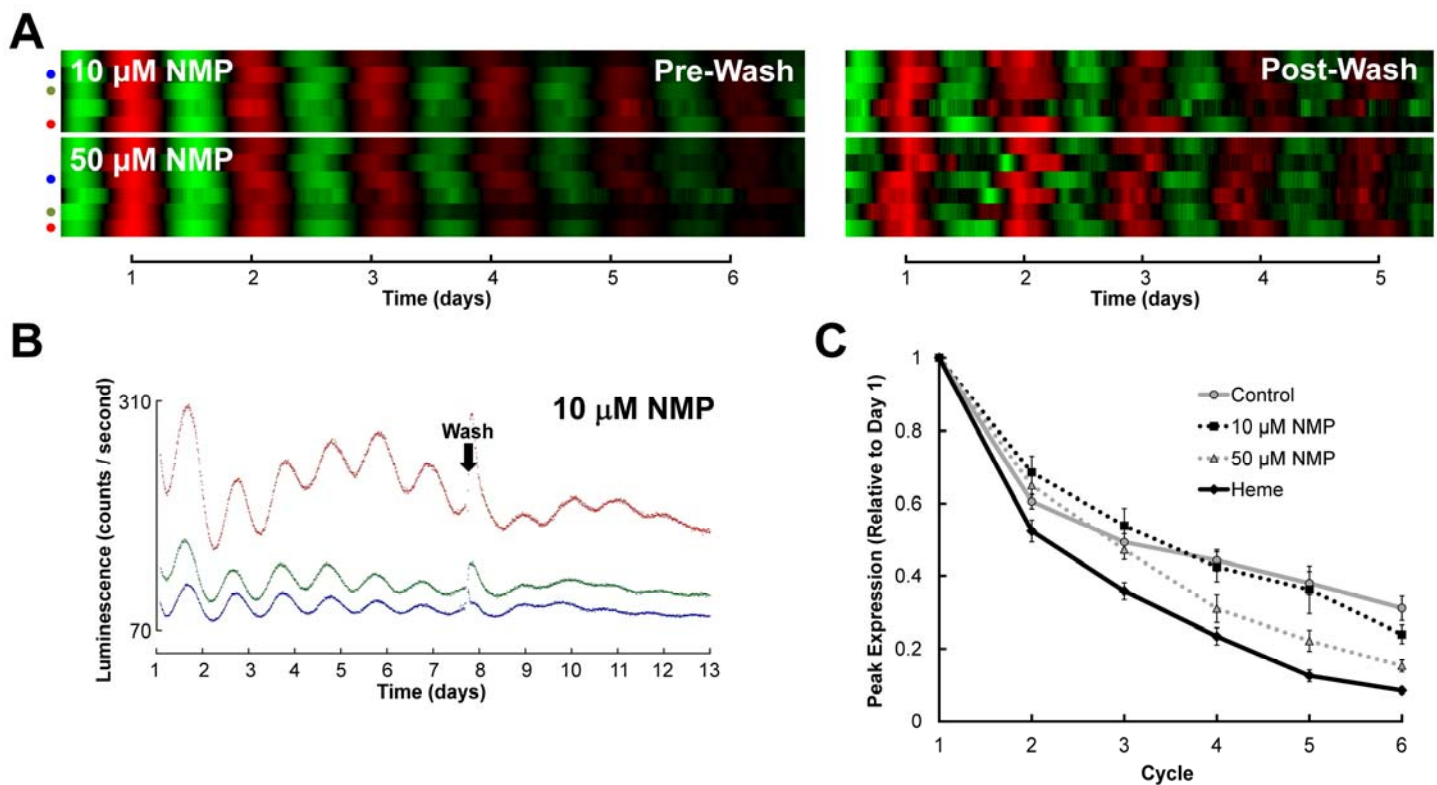

**Figure S9. A**, All baseline-subtracted, smoothed, and normalized data for SCNs treated with 10  $\mu$ M or 50  $\mu$ M N-methylprotoporphyrin IX (NMP). Dots to the left of a heatmap row indicate which raw traces are represented in part B or in Fig. 7A. **B**, Three representative raw traces of PER2::LUC activity for SCNs treated with 10  $\mu$ M NMP. **C**, We found a significant effect of treatment ( $F_{(3,37)} = 6.235$ ,  $p = .002$ ) and a significant treatment X cycle interaction ( $F_{(15,185)} = 5.07$ ,  $p < .0001$ ); post-hoc tests suggested that these effects were due to a difference between 30  $\mu$ M heme and control groups ( $p = .001$ ) rather than to a difference between the control and the NMP groups ( $p = 1.00$  and  $p = .240$  for 10  $\mu$ M and 50  $\mu$ M, respectively).
